# Supplementary material for: Prognostic Significance of Macrophage Infiltration in Leiomyosarcomas
Source: Oxford University Press journal article supplement (doi:10.1158/1078-0432.ccr-07-1712), 2008-03-01
Supplement: 10780432ccr071712-sup-supplementary_table_s1.xls [file 10780432ccr071712-sup-supplementary_table_s1.xls]

## Sheet: Sheet1
	Case no.	Array	Sex	Age	Diagnosis	Tumor site
	4411	shfp238	female	48	leiomyosarcoma	Soft tissue - retroperitoneum
	4401	shfp189	female	49	leiomyosarcoma	Liver (origin uncertain)
	4404	shfp207	male	70	leiomyosarcoma	Lung
	4415	shfp245	male	57	leiomyosarcoma	Lung (metastases from LMS arising in the epididymis)
	4420	shfp247	male	63	leiomyosarcoma	Soft tissue - retroperitoneum
	4427	shfp078	male	48	leiomyosarcoma	Soft tissue - thoracic wall
	4606	shgg063	female	56	leiomyosarcoma	Lung (metastases from uterine LMS)
	4410	shfp148	male	50	leiomyosarcoma	Soft tissue - left upper leg
