# Supplementary material for: Prognostic Significance of Macrophage Infiltration in Leiomyosarcomas
Source: Oxford University Press journal article supplement (doi:10.1158/1078-0432.ccr-07-1712), 2008-03-01
Supplement: 10780432ccr071712-sup-supplementary_table_s2.xls [file 10780432ccr071712-sup-supplementary_table_s2.xls]

## Sheet: Sheet1
	Gene Symbol	Clone ID	Gene Name
	CD68	hSQ029121	CD68 antigen
	CD163	hSQ014075	CD163 antigen
	CD163	hSQ028072	CD163 antigen
	CCL2	hSQ044622	chemokine (C-C motif) ligand 2
	CCL3	hSQ043161	chemokine (C-C motif) ligand 3
	CCL4	hSQ008725	chemokine (C-C motif) ligand 4
	CCL4	hSQ034150	chemokine (C-C motif) ligand 4
	CCL4	hSQ045399	chemokine (C-C motif) ligand 4
	CCL7	hSQ014300	chemokine (C-C motif) ligand 7
	CCL8	hSQ031133	chemokine (C-C motif) ligand 8
	CSF1	hSQ038856	colony stimulating factor 1 (macrophage)
	CSF1	hSQ040028	colony stimulating factor 1 (macrophage)
	CSF1	hSQ014808	colony stimulating factor 1 (macrophage)
	CSF1	hSQ014688	colony stimulating factor 1 (macrophage)
	CSF2	hSQ030742	colony stimulating factor 2 (granulocyte-macrophage)
	EGF	hSQ034503	epidermal growth factor (beta-urogastrone)
	FGF2	hSQ038944	fibroblast growth factor 2 (basic)
	IL6	hSQ034432	interleukin 6 (interferon, beta 2)
	IL6	hSQ023389	interleukin 6 (interferon, beta 2)
	IL12A	hSQ037255	interleukin 12A (natural killer cell stimulatory factor 1, cytotoxic lymphocyte maturation factor 1, p35)
	IL12B	hSQ030199	interleukin 12B (natural killer cell stimulatory factor 2, cytotoxic lymphocyte maturation factor 2, p40)
	IL18	hSQ024031	interleukin 18 (interferon-gamma-inducing factor)
	IL1B	hSQ040913	interleukin 1, beta
	IL8	hSQ028189	interleukin 8
	MIF	hSQ038688	macrophage migration inhibitory factor (glycosylation-inhibiting factor)
	MMP12	hSQ024095	matrix metallopeptidase 12 (macrophage elastase)
	MMP9	hSQ006869	matrix metallopeptidase 9 (gelatinase B, 92kDa gelatinase, 92kDa type IV collagenase)
	MMP9	hSQ037184	matrix metallopeptidase 9 (gelatinase B, 92kDa gelatinase, 92kDa type IV collagenase)
	MMP7	hSQ017001	matrix metallopeptidase 7 (matrilysin, uterine)
	MST1	hSQ017717	macrophage stimulating 1 (hepatocyte growth factor-like)
	TGFB1	hSQ033605	transforming growth factor, beta 1 (Camurati-Engelmann disease)
	TGFB1	hSQ040704	transforming growth factor, beta 1 (Camurati-Engelmann disease)
	TNF	hSQ030941	tumor necrosis factor (TNF superfamily, member 2)
	VEGF	hSQ045267	vascular endothelial growth factor
	VEGF	hSQ041763	vascular endothelial growth factor
	VEGF	hSQ036263	vascular endothelial growth factor
	VEGF	hSQ002337	vascular endothelial growth factor
	CSF1R	hSQ029479	colony stimulating factor 1 receptor, formerly McDonough feline sarcoma viral (v-fms) oncogene homolog
	CSF2RA	hSQ034568	colony stimulating factor 2 receptor, alpha, low-affinity (granulocyte-macrophage)
	CSF2RB	hSQ030415	colony stimulating factor 2 receptor, beta, low-affinity (granulocyte-macrophage)
	TGFBR1	hSQ027419	transforming growth factor, beta receptor I (activin A receptor type II-like kinase, 53kDa)
	TGFBR1	hSQ029721	transforming growth factor, beta receptor I (activin A receptor type II-like kinase, 53kDa)
	TGFBR1	hSQ020143	transforming growth factor, beta receptor I (activin A receptor type II-like kinase, 53kDa)
