# Supplementary material for: Prognostic Significance of Macrophage Infiltration in Leiomyosarcomas
Source: Oxford University Press journal article supplement (doi:10.1158/1078-0432.ccr-07-1712), 2008-03-01
Supplement: 10780432ccr071712-sup-supplementary_table_s3.xls [file 10780432ccr071712-sup-supplementary_table_s3.xls]

## Sheet: Sheet2
	CD163+ macrophage infiltrates by scores	Scores for CD68+ macrophage infiltrates
	sparse	1 (n = 16)
		2 (n = 2)
		3 (n = 0)
	moderate*	1 (n = 25)
		2 (n = 34)
		3 (n = 6)
	extensive**	1 (n = 7)
		2 (n = 24)
		3 (n = 33)
	* one non-scorable case for CD68
	** one non-scorable case for CD68
